# Supplementary material for: Palaeo-landslide dams controlled the formation of Late Quaternary terraces in Diexi, the upper Minjiang River, eastern Tibetan Plateau
Source: Copernicus journal article supplement (doi:10.5194/egusphere-2023-929), 2023-06-26
Supplement: Supplementary file 1 [file egusphere-2023-929-supplement.pdf]

# Supplementary information to “Palaeo-landslide dams controlled the formation of Late Quaternary terraces in Diexi, the upper Minjiang River, eastern Tibetan Plateau”

Jingjuan Li<sup>1</sup>, Xuanmei Fan<sup>1</sup>, Zhiyong Ding<sup>1</sup>, Marco Lovati<sup>1</sup>

<sup>1</sup> State Key Laboratory of Geohazard Prevention and Geoenvironment Protection, Chengdu University of Technology, Chengdu 610059, China

Correspondence to: Xuanmei Fan (fxm\_cdut@qq.com)

We summarized 124 chronological data and 30 incision rate data from previous studies of the upper Minjiang River. Detail information is listed in Table 1.

**Table S1. 124 chronological data and 30 incision rate data from previous studies of the upper Minjiang River**

| No | Area          | Reach                  | Site                       | Elev. (m) | Depth (m) | Height above the river (m) | Terrace level | Material | Dating method | Ages (ka) | Error | Incision rate (m/×10 <sup>4</sup> yr) | Refers             |
|----|---------------|------------------------|----------------------------|-----------|-----------|----------------------------|---------------|----------|---------------|-----------|-------|---------------------------------------|--------------------|
| 1  |               | Gamisi -<br>Gonggaling | Doujitai                   | -         | -         | 246                        | T4            | -        | ESR           | 376.3     | -     | 6.5                                   | Yang et al. (2003) |
| 2  |               | Gamisi -<br>Gonggaling | North of<br>Xiaoxitia<br>n | -         | -         | 40                         | T3            | -        | TL            | 31.2      | -     | 12.8                                  | Zhao et al. (1994) |
| 3  |               | Gamisi -<br>Gonggaling | Kakagou                    | -         | -         | 124                        | above T3      | cave     | ESR           | 322.67    | -     | 3.8                                   | Yang et al. (2003) |
| 4  | Up-<br>stream | Zhangla -<br>Gamisi    | Chuanpa<br>n               | -         | -         | 25                         | T2            | -        | ESR           | 287.27    | -     | 0.9                                   |                    |
| 5  |               | Zhangla -<br>Gamisi    | Chuanpa<br>n               | -         | -         | 25                         | T2            | -        | TL            | 30.2      | -     | 8.3                                   | Zhou et al. (2000) |
| 6  |               | Zhangla -<br>Gamisi    | Chuanpa<br>n               | -         | -         | 25                         | T2            | -        | TL            | 46.4      | -     | 5.4                                   |                    |
| 7  |               | Zhangla -<br>Gamisi    | Chuanpa<br>n               | -         | -         | 28                         | T2            | -        | ESR           | 642.7     | -     | 0.4                                   | Yang et al. (2003) |
| 8  |               | Zhangla -<br>Gamisi    | Shanbaxi<br>ang            | -         | -         | 150                        | T4            | -        | TL            | 134.8     | -     | 11.1                                  | Zhou et al. (2000) |
| 9  |               | Zhangla -<br>Gamisi    | Zhangla                    | -         | -         | 45                         | top of T3     | loess    | 14C           | 10.116    | -     | -                                     | Zhu (2014)         |

|    |                        |                           |   |   |     |           |       |      |        |      |      |                        |
|----|------------------------|---------------------------|---|---|-----|-----------|-------|------|--------|------|------|------------------------|
| 10 | Zhangla -<br>Gamisi    | Zhangla                   | - | - | 90  | top of T3 | loess | 14C  | 6.693  | -    | -    |                        |
| 11 | Zhangla -<br>Gamisi    | Zhangla                   | - | - | 35  | T3        | -     | 14C  | 35.16  | -    | -    |                        |
| 12 | Zhangla -<br>Gamisi    | Zhangla                   | - | - | 20  | T3        | -     | 14C  | 22.555 | -    | -    |                        |
| 13 | Zhangla -<br>Gamisi    | North of<br>Zhangla       | - | - | 60  | T2        | -     | 14C  | 7.75   | -    | 77.4 | Kirby et al.<br>(2002) |
| 14 | Zhangla -<br>Gamisi    | North of<br>Zhangla       | - | - | 35  | T2        | -     | 14C  | 6.12   | -    | 57.2 |                        |
| 15 | Zhangla -<br>Gamisi    | Zhangla                   | - | - | 15  | T2        | -     | 14C  | 18.565 | -    | -    | Zhu (2014)             |
| 16 | Zhangla -<br>Gamisi    | Zhangla                   | - | - | 15  | T2        | -     | OSL  | 19.2   | -    | -    |                        |
| 17 | Zhangla -<br>Gamisi    | Zhangla                   | - | - | 40  | T2        | -     | TL   | 15.3   | -    | 26.1 | Zhao et al.<br>(1994)  |
| 18 | Zhangla -<br>Gamisi    | Zhangla                   | - | - | 80  | T2        | -     | TL   | 23.6   | -    | 33.9 |                        |
| 19 | Zhangla -<br>Gamisi    | Zhangla                   | - | - | -   | T2        | -     | TL   | 31.2   | -    | -    | Gao and Li<br>(2006)   |
| 20 | Zhangla -<br>Gamisi    | Zhangla                   | - | - | -   | T2        | -     | 14C  | 22.78  | -    | -    | Kirby et al.<br>(2002) |
| 21 | Zhangla -<br>Gamisi    | Zhangla                   | - | - | -   | T1        | -     | TL   | 15.3   | -    | -    | Gao and Li<br>(2006)   |
| 22 | Zhangla -<br>Gamisi    | Zhangla                   | - | - | -   | T1        | -     | 14C  | 9.231  | 6.49 | -    | Kirby et al.<br>(2000) |
| 23 | Zhangla -<br>Gamisi    | Zhangla                   | - | - | 10  | T1        | -     | 14C  | 2.81   | -    | 35.6 |                        |
| 24 | Gamisi -<br>Gonggaling | Qiming                    | - | - | 120 | T2        | -     | TL   | 27     | -    | 44.4 | Zhou et al.<br>(2000)  |
| 25 | Zhangla -<br>Gamisi    | Zhangla<br>Chuanzh<br>usi | - | - | 35  | T2        | -     | 14C  | 12.94  | -    | 27   | Kirby et al.<br>(2002) |
| 26 | Zhangla -<br>Gamisi    | Linpo-<br>chuanzig<br>ou  | - | - | 200 | T2        | -     | 14C  | 23.46  | -    | 85.3 |                        |
| 27 | Zhangla -<br>Gamisi    | Chuanzi<br>gou            | - | - | 80  | upper T4  | -     | IRSL | 157    | 28   | 5.1  | Kirby et al.<br>(2000) |
| 28 | Zhangla -<br>Gamisi    | Chuanzi<br>gou            | - | - | 300 | lower T4  | -     | IRSL | 254    | 35   | 11.8 |                        |
| 29 | Zhangla -<br>Gamisi    | Chuanzi<br>gou            | - | - | 160 | T4        | -     | TL   | 157.6  | -    | 10.2 | Zhao et al.<br>(1994)  |
| 30 | Zhangla -<br>Gamisi    | Chuanzi<br>gou            | - | - | 250 | upper T4  | -     | TL   | 830    | -    | 3    |                        |
| 31 | Zhangla -<br>Gamisi    | East of<br>Songpan        | - | - | 80  | top of T3 | -     | ESR  | 107    | -    | -    | Yang<br>(2005)         |

|    |                              |                      |                           |             |    |                 |            |            |         |        |       |            |                        |
|----|------------------------------|----------------------|---------------------------|-------------|----|-----------------|------------|------------|---------|--------|-------|------------|------------------------|
| 32 | Zhangla -<br>Gamisi          | East of<br>Songpan   | -                         | -           | 20 | bottom of<br>T2 | -          | ESR        | 25      | -      | -     |            |                        |
| 33 | Diexi                        | Taiping              | -                         | 1           | -  | -               | Lacustrine | OSL        | 9.5     | 0.5    | -     | Zhong      |                        |
| 34 | Diexi                        | Taiping              | -                         | 2.1         | -  | -               | Lacustrine | 14C        | 13.395  | 0.209  | -     | (2017)     |                        |
| 35 | Diexi                        | Taiping              | -                         | 4.1         | -  | -               | Lacustrine | 14C        | 14.327  | 0.192  | -     |            |                        |
| 36 | Diexi                        | Taiping              | -                         | 4.2         | -  | -               | Lacustrine | OSL        | 10.3    | 0.5    | -     |            |                        |
| 37 | Diexi                        | Taiping              | -                         | 5.3         | -  | -               | Lacustrine | OSL        | 8.9     | 0.6    | -     |            |                        |
| 38 | Diexi                        | Taiping              | -                         | 7.5         | -  | -               | Lacustrine | OSL        | 11.1    | 0.5    | -     |            |                        |
| 39 | Diexi                        | Taiping              | -                         | 8.6         | -  | -               | Lacustrine | OSL        | 10.2    | 0.7    | -     |            |                        |
| 40 | Diexi                        | Taiping              | -                         | 8.7         | -  | -               | Lacustrine | 14C        | 14.688  | 0.23   | -     |            |                        |
| 41 | Diexi                        | Taiping              | -                         | 8.9         | -  | -               | Lacustrine | OSL        | 18.9    | 3.5    | -     |            |                        |
| 42 | Diexi                        | Taiping              | -                         | 9.6         | -  | -               | Lacustrine | OSL        | 10.1    | 0.7    | -     |            |                        |
| 43 | Diexi                        | Taiping              | -                         | 10.1        | -  | -               | Lacustrine | 14C        | 14.173  | 0.153  | -     |            |                        |
| 44 | Diexi                        | Taiping              | -                         | 11.3        | -  | -               | Lacustrine | OSL        | 8.4     | 0.8    | -     |            |                        |
| 45 | Diexi                        | Taiping              | 2239.<br>5                | 1.1         | -  | -               | Lacustrine | OSL        | 25      | 3.2    | -     | Guo (2018) |                        |
| 46 | Diexi                        | Taiping              | 2239.<br>3                | 1.3         | -  | -               | Lacustrine | OSL        | 19.6    | 2.7    | -     |            |                        |
| 47 | Diexi                        | Taiping              | 2232                      | 8.6         | -  | -               | Lacustrine | OSL        | 20.7    | 2.4    | -     |            |                        |
| 48 | Diexi                        | Taiping              | 2231.<br>6                | 9           | -  | -               | Lacustrine | OSL        | 22.8    | 3.6    | -     |            |                        |
| 49 | From<br>downstre<br>am to    | Maoxian -<br>Zhangla | North of<br>Jiaochan<br>g | -           | -  | 56              | T2         | Lacustrine | IRSL    | 14.2   | 1.7   | 39.4       | Kirby et al.<br>(2000) |
| 50 | upstream<br>or Study<br>area | Maoxian -<br>Zhangla | Jiaochan<br>g             | -           | -  | 162             | T5         | Lacustrine | 14C     | 9.483  | 0.21  | -          | Wang et al.<br>(2007)  |
| 51 |                              | Maoxian -<br>Zhangla | Jiaochan<br>g             | -           | -  | 180             | T2         | Lacustrine | 14C     | 10     | -     | 198        | Duan et al.<br>(2002)  |
| 52 |                              | Maoxian -<br>Zhangla | Jiaochan<br>g             | -           | -  | 90              | T2         | Lacustrine | 14C     | 14     | -     | 64.3       |                        |
| 53 |                              | Maoxian -<br>Zhangla | Jiaochan<br>g             | -           | -  | 35              | T2         | Lacustrine | 14C     | 6.3395 | 0.16  | -          | Wang et al.<br>(2007)  |
| 54 |                              | Maoxian -<br>Zhangla | Jiaochan<br>g             | -           | -  | 30              | T2         | Lacustrine | 14C     | 22     | -     | 13.6       | Duan et al.<br>(2002)  |
| 55 |                              | Maoxian -<br>Zhangla | Jiaochan<br>g             | -           | -  | 196             | T2         | Lacustrine | ESR     | 390    | -     | 5          | Yang et al.<br>(2003)  |
| 56 |                              | Maoxian -<br>Zhangla | Jiaochan<br>g             | -           | -  | 180             | T2         | Lacustrine | ESR     | 504.74 | -     | 3.6        |                        |
| 57 |                              | Diexi                | Tuanjie                   | 2254.<br>97 | -  | -               | T5         | Lacustrine | 14C     | 8.3755 | 0.12  | -          | Wang et al.<br>(2020)  |
| 58 |                              | Diexi                | Tuanjie                   | 2213.<br>84 | -  | -               | T4         | Lacustrine | 14C     | 4.8105 | 0.07  | -          |                        |
| 59 |                              | Diexi                | Tuanjie                   | 2185.<br>68 | -  | -               | T3         | Lacustrine | 14C     | 3.7015 | 0.27  | -          |                        |
| 60 |                              | Diexi                | Tuanjie                   | -           | -  | -               | -          | Lacustrine | AMS 14C | 24.445 | 0.653 | -          |                        |

|    |       |           |   |       |   |    |            |         |         |       |   |                        |
|----|-------|-----------|---|-------|---|----|------------|---------|---------|-------|---|------------------------|
| 61 | Diexi | Tuanjie   | - | -     | - | -  | Lacustrine | AMS 14C | 27.35   | 0.977 | - | Wang et al.<br>(2007)  |
| 62 | Diexi | Tuanjie   | - | -     | - | -  | Lacustrine | AMS 14C | 24.447  | 0.519 | - |                        |
| 63 | Diexi | Tuanjie   | - | -     | - | -  | Lacustrine | AMS 14C | 9.735   | 0.712 | - |                        |
| 64 | Diexi | Tuanjie   | - | -     | - | -  | Lacustrine | AMS 14C | 13.602  | 0.128 | - | Wang<br>(2009)         |
| 65 | Diexi | Tuanjie   | - | -     | - | -  | Lacustrine | AMS 14C | 15.08   | 0.065 | - |                        |
| 66 | Diexi | Tuanjie   | - | 0     | - | T2 | Lacustrine | OSL     | 10.63   | 1.27  | - | Jiang et al.<br>(2014) |
| 67 | Diexi | Tuanjie   | - | 0.05  | - | T2 | Lacustrine | OSL     | 15.9    | 1.1   | - | Mao<br>(2011)          |
| 68 | Diexi | Tuanjie   | - | 0.95  | - | T2 | Lacustrine | OSL     | 18.17   | 2.66  | - | Jiang et al.<br>(2014) |
| 69 | Diexi | Tuanjie   | - | 1.05  | - | T2 | Lacustrine | OSL     | 18      | 1.1   | - | Mao<br>(2011)          |
| 70 | Diexi | Tuanjie   | - | 1.95  | - | T2 | Lacustrine | OSL     | 21.88   | 4.58  | - | Jiang et al.<br>(2014) |
| 71 | Diexi | Tuanjie   | - | 3.05  | - | T2 | Lacustrine | OSL     | 13.7    | 1.9   | - | Mao<br>(2011)          |
| 72 | Diexi | Tuanjie   | - | 3.85  | - | T2 | Lacustrine | OSL     | 13.88   | 1.39  | - | Jiang et al.<br>(2014) |
| 73 | Diexi | Tuanjie   | - | 4.05  | - | T2 | Lacustrine | OSL     | 17.3    | 3.4   | - | Mao                    |
| 74 | Diexi | Tuanjie   | - | 5.05  | - | T2 | Lacustrine | OSL     | 14.4    | 1.5   | - | (2011)                 |
| 75 | Diexi | Tuanjie   | - | 6.05  | - | T2 | Lacustrine | OSL     | 14.19   | 1.91  | - | Jiang et al.<br>(2014) |
| 76 | Diexi | Tuanjie   | - | 6.05  | - | T2 | Lacustrine | OSL     | 16.5    | 2.1   | - | Mao<br>(2011)          |
| 77 | Diexi | Tuanjie   | - | 6.9   | - | T2 | plant      | 14C     | 14.6295 | 0.32  | - | Shi et al.<br>(2020)   |
| 78 | Diexi | Tuanjie   | - | 7.05  | - | T2 | Lacustrine | OSL     | 14.91   | 3.77  | - | Jiang et al.<br>(2014) |
| 79 | Diexi | Tuanjie   | - | 8.05  | - | T2 | Lacustrine | OSL     | 15.9    | 2     | - | Mao<br>(2011)          |
| 80 | Diexi | Tuanjie   | - | 8.3   | - | T2 | plant      | 14C     | 16.48   | 0.18  | - | Shi et al.<br>(2020)   |
| 81 | Diexi | Tuanjie   | - | 8.95  | - | T2 | Lacustrine | OSL     | 16.6    | 2.67  | - | Jiang et al.<br>(2014) |
| 82 | Diexi | Tuanjie   | - | 9.05  | - | T2 | Lacustrine | OSL     | 19      | 1.7   | - | Mao                    |
| 83 | Diexi | Tuanjie   | - | 10.05 | - | T2 | Lacustrine | OSL     | 18.8    | 1.7   | - | (2011)                 |
| 84 | Diexi | Tuanjie   | - | 10.95 | - | T2 | Lacustrine | OSL     | 18.6    | 2.86  | - | Jiang et al.<br>(2014) |
| 85 | Diexi | Tuanjie I | - | 0.5   | - | -  | Lacustrine | OSL     | 10.9    | 0.6   | - | Zhong                  |
| 86 | Diexi | Tuanjie I | - | 1.5   | - | -  | Lacustrine | OSL     | 17.7    | 0.8   | - | (2017)                 |
| 87 | Diexi | Tuanjie I | - | 2.5   | - | -  | Lacustrine | OSL     | 12      | 0.7   | - |                        |
| 88 | Diexi | Tuanjie I | - | 3.5   | - | -  | Lacustrine | OSL     | 9.8     | 0.7   | - |                        |
| 89 | Diexi | Tuanjie I | - | 4.5   | - | -  | Lacustrine | OSL     | 17.8    | 0.9   | - |                        |

|     |       |             |        |                     |   |                                |            |         |         |       |   |                           |
|-----|-------|-------------|--------|---------------------|---|--------------------------------|------------|---------|---------|-------|---|---------------------------|
| 90  | Diexi | Tuanjie I   | -      | 5                   | - | -                              | Lacustrine | OSL     | 11.1    | 0.9   | - |                           |
| 91  | Diexi | Tuanjie I   | -      | 6.1                 | - | -                              | Lacustrine | OSL     | 10      | 0.8   | - |                           |
| 92  | Diexi | Tuanjie I   | -      | 8.15                | - | -                              | Charcoal   | AMS 14C | 13.837  | 0.173 | - |                           |
| 93  | Diexi | Tuanjie I   | -      | 8.5                 | - | -                              | Lacustrine | OSL     | 16.1    | 0.7   | - |                           |
| 94  | Diexi | Tuanjie I   | -      | 9                   | - | -                              | Lacustrine | OSL     | 12.7    | 0.6   | - |                           |
| 95  | Diexi | Tuanjie I   | -      | 10                  | - | -                              | Lacustrine | OSL     | 19.2    | 3.4   | - |                           |
| 96  | Diexi | Tuanjie I   | -      | 10.5                | - | -                              | Lacustrine | OSL     | 19.5    | 1     | - |                           |
| 97  | Diexi | Tuanjie I   | -      | 11.1                | - | -                              | Charcoal   | AMS 14C | 14.23   | 0.15  | - |                           |
| 98  | Diexi | Tuanjie II  | -      | 0.1                 | - | -                              | Lacustrine | OSL     | 20.3    | 1.4   | - |                           |
| 99  | Diexi | Tuanjie II  | -      | 0.6                 | - | -                              | Lacustrine | OSL     | 12.1    | 0.7   | - |                           |
| 100 | Diexi | Tuanjie II  | -      | 0.7                 | - | -                              | Lacustrine | OSL     | 20.4    | 0.8   | - |                           |
| 101 | Diexi | Tuanjie II  | -      | 2.1                 | - | -                              | Lacustrine | OSL     | 14.2    | 1.2   | - |                           |
| 102 | Diexi | Tuanjie II  | -      | 2.4                 | - | -                              | Lacustrine | AMS 14C | 14.67   | 0.23  | - |                           |
| 103 | Diexi | Tuanjie II  | -      | 2.9                 | - | -                              | Lacustrine | AMS 14C | 14.439  | 0.176 | - |                           |
| 104 | Diexi | Tuanjie II  | -      | 3.7                 | - | -                              | Lacustrine | OSL     | 20.9    | 1     | - |                           |
| 105 | Diexi | Tuanjie II  | -      | 5.6                 | - | -                              | Lacustrine | OSL     | 15.5    | 1     | - |                           |
| 106 | Diexi | Tuanjie     | -      | 2.30<br>(thickness) | - | -                              | Lacustrine | 14C     | 35.7815 | 0.37  | - | Zhang et al. (2009)       |
| 107 | Diexi | Tuanjie     | -      | 4.55<br>(thickness) | - | -                              | Lacustrine | 14C     | 31.1315 | 0.1   | - |                           |
| 108 | Diexi | Tuanjie     | -      | 7.70<br>(thickness) | - | -                              | Lacustrine | 14C     | 30.655  | 0.03  | - |                           |
| 109 | Diexi | TuanjieII I | 2158.9 | 4                   | - | T3                             | Lacustrine | OSL     | 19      | 1.9   | - | Guo (2018)                |
| 110 | Diexi | TuanjieII   | 2161.8 | 3                   | - | T2                             | Lacustrine | OSL     | 22.9    | 2.7   | - |                           |
| 111 | Diexi | TuanjieI    | 2165.6 | 7.5                 | - | T1                             | Lacustrine | OSL     | 23.7    | 3.2   | - |                           |
| 112 | Diexi | valley      | -      | -                   | - | T5                             | Sand       | TL      | 90.446  | 3     | - | Gao and Li (2006)         |
| 113 | Diexi | valley      | -      | -                   | - | T3                             | Sand       | TL      | 50.8    | 3.9   | - |                           |
| 114 | Diexi | valley      | -      | -                   | - | T2                             | Sand       | TL      | 12.7    | 1     | - |                           |
| 115 | Diexi | valley      | -      | -                   | - | bottom of lacustrine sediments | Lacustrine | 14C     | 22.675  | 2.44  | - | Xiaokang Luo et al., 2019 |

|     |                       |                               |   |   |     |                 |       |     |        |   |      |                       |
|-----|-----------------------|-------------------------------|---|---|-----|-----------------|-------|-----|--------|---|------|-----------------------|
| 116 | Wenchuan -<br>Maoxiao | East of<br>Yaogou,<br>Maoxian | - | - | 140 | upper T3        | -     | ESR | 110.25 | - | 12.7 | Yang et al.<br>(2003) |
| 117 | Wenchuan -<br>Maoxiao | North of<br>Maoxian           | - | - | 120 | T2              | -     | TL  | 20.7   | - | 58   | Zhao et al.<br>(1994) |
| 118 | Wenchuan -<br>Maoxiao | Maoxian                       | - | - | 100 | upper of T3     | loess | ESR | 62     | - | -    | Yang<br>(2005)        |
| 119 | Wenchuan<br>- Maoxiao | Maoxian                       | - | - | 90  | upper of T3     | loess | ESR | 100.5  | - | -    |                       |
| 120 | Down-<br>stream       | Wenchuan -<br>Maoxiao         | - | - | 80  | bottom of<br>T3 | -     | OSL | 39.9   | - | -    | Zhu (2014)            |
| 121 | Wenchuan -<br>Maoxiao | Maoxian                       | - | - | 35  | T2              | -     | 14C | 27.84  | - | -    |                       |
| 122 | Wenchuan -<br>Maoxiao | Maoxian                       | - | - | 20  | T2              | -     | 14C | 24.68  | - | -    |                       |
| 123 | Wenchuan -<br>Maoxiao | Yantouz<br>hai,<br>Maoxian    | - | - | 160 | lower T3        | -     | ESR | 279.99 | - | 5.7  | Yang et al.<br>(2003) |
| 124 | Wenchuan -<br>Maoxiao | North of<br>Wenchua<br>n      | - | - | 160 | T4              | cave  | ESR | 370.5  | - | 4.3  |                       |

## References

- Duan, L., Wang, L., Yang, L., and Dong, X.: The ancient climatic evolution characteristic reflected by carbon and oxygen isotopes of carbonate in the ancient barrier lacustrine deposits, Diexi, Minjiang River, *The Chinese Journal of Geological Hazard and Control*, 13, 91-96, <https://doi.org/10.3969/j.issn.1003-8035.2002.02.019>, 2002.
- Gao, X. and Li, Y.: Comparison on the incision rate in the upper and middle reaches of Minjiang River, *Resources and environment in the Yangtze Basin*, 15, 517-521, <https://doi.org/10.3969/j.issn.1004-8227.2006.04.020>, 2006.
- Guo, P.: Grain Size Characteristics and Optically stimulated luminescence Geochronology of Sediments in Diexi palaeo-dammed Lake, Upper Reaches of Minjiang River, China University of Geosciences, Beijing, 85 pp., 2018.
- Jiang, H., Mao, X., Xu, H., Yang, H., Ma, X., Zhong, N., and Li, Y.: Provenance and earthquake signature of the last deglacial Xinmocun lacustrine sediments at Diexi, East Tibet, *Geomorphology*, 204, 518-531, <https://doi.org/10.1016/j.geomorph.2013.08.032>, 2014.
- Kirby, E., Whipple, K. X., Burchfiel, B. C., Tang, W., Berger, G., Sun, Z., and Chen, Z.: Neotectonics of the Min Shan, China: Implications for mechanisms driving Quaternary deformation along the eastern margin of the Tibetan Plateau, *Geological Society of America Bulletin*, 112, 375-393, [https://doi.org/10.1130/0016-7606\(2000\)112<375:NOTMSC>2.0.CO;2](https://doi.org/10.1130/0016-7606(2000)112<375:NOTMSC>2.0.CO;2), 2000.

- Kirby, E., Reiners, P. W., Krol, M. A., Whipple, K. X., Hodges, K. V., Farley, K. A., Tang, W., and Chen, Z.: Late Cenozoic evolution of the eastern margin of the Tibetan Plateau Inferences from  $^{40}\text{Ar}/^{39}\text{Ar}$  and (U-Th)He thermochronology, *tectonics*, 21, 1-20, <https://doi.org/10.1029/2000TC001246>, 2002.
- Mao, X.: Preliminary study on lacustrine sediments at Diexi in the upper reach of the Minjiang River during the last deglaciation, China university of Geosciences, Beijing, 71 pp., 2011.
- Shi, W., Jiang, H., Mao, X., and Xu, H.: Pollen record of climate change during the last deglaciation from the eastern Tibetan Plateau, *Plos One*, 15, <https://doi.org/10.1371/journal.pone.0232803>, 2020.
- Wang, L., Wang, X., Xu, X., and Cui, J.: What happened on the upstream of Minjiang River in Sichuan Province 20,000 years ago, *Earth Science Frontiers*, 14, 189-196, 2007.
- Wang, L., Wang, X., Shen, J., Xu, X., Cui, J., Zhang, Z., and Zhou, Z.: The effect of evolution of Diexi ancient barrier lake in the upper Mingjiang River on the Chengdu Plain in Sichuan, China, *Journal of Chengdu University of technology*, 47, 1-15, <https://doi.org/10.3969/j.issn.1671-9727.2020.01.01>, 2020.
- Wang, X.: The Environment Geological Information in the Sediments of Diexi Ancient Dammed Lake on the upstream of Mingjiang River in Sichuan Province, China, Chengdu University of Technology, Chengdu, 116 pp., 2009.
- Yang, N., Zhang, Y., Meng, H., and Zhang, H.: Study of the Minjiang River terraces in the western Sichuan Plateau, *Journal of Geomechanics*, 9, 363-370, <https://doi.org/10.3969/j.issn.1006-6616.2003.04.008>, 2003.
- Yang, W.: Research of Sedimentary Record in Terraces and Climate Vary in the Upper Reaches of Minjiang River, China, Chengdu University of Technology, Chengdu, 2005.
- Zhang, Y., Zhu, L., Yang, W., Luo, H., Jiang, L., He, D., and Liu, J.: High resolution rapid climate change records of lacustrine deposits of Diexi Basin in the eastern margin of Qinghai-Tibet Plateau, 40-30 ka BP, *Earth Science Frontiers*, 16, 91-98, 2009.
- Zhao, X., Deng, Q., and Chen, S.: Tectonic geomorphology of the Minshan uplift in western Sichuan, southwestern China, *Seismology and Geology*, 16, 429-439, <https://doi.org/CNKI:SUN:DZDZ.0.1994-04-017>, 1994.
- Zhong, N.: Earthquake and Provenance Analysis of the Lacustrine Sediments in the Upper Reaches of the Min River during the Late Pleistocene, Institute of Geology, China Earthquake Administration, Beijing, 193 pp., 2017.
- Zhou, R., Pu, X., He, Y., Li, X., and Ge, T.: Recent activity of Minjiang fault zone, uplift of Minshan block and their relationship with seismicity of Sichuan, *Seismology and Geology*, 22, 285-294, <https://doi.org/CNKI:SUN:DZDZ.0.2000-03-009>, 2000.
- Zhu, J.: A preliminary study on the upper reaches of Minjiang River Terrace, Chengdu University of Technology, Chengdu, 73 pp., 2014.
